# Supplementary material for: Serum Lipopolysaccharide‐Binding Protein Levels and the Incidence of Cardiovascular Disease in a General Japanese Population: The Hisayama Study
Source: PubMed Central journal article supplement — J Am Heart Assoc. 2019 Oct 28;8(21):e013628. doi: 10.1161/JAHA.119.013628 (PMC6898821; doi:10.1161/jaha.119.013628), 2019-10-28
Supplement: JAH3-8-e013628-s001.pdf [file JAH3-8-e013628-s001.pdf]

# **SUPPLEMENTAL MATERIAL**

**Table S1. Correlations between serum LBP levels and other variables (n=2,568), 2002.**

| Variable                              | Unadjusted              |          | Adjusted for age and sex |          |
|---------------------------------------|-------------------------|----------|--------------------------|----------|
|                                       | Correlation coefficient | <i>P</i> | Correlation coefficient  | <i>P</i> |
| Age                                   | 0.19                    | <0.0001  | -                        | -        |
| Male sex                              | 0.10                    | <0.0001  | -                        | -        |
| Systolic blood pressure               | 0.17                    | <0.0001  | 0.11                     | <0.0001  |
| Diastolic blood pressure              | 0.15                    | <0.0001  | 0.13                     | <0.0001  |
| Use of antihypertensive agents        | 0.14                    | <0.0001  | 0.09                     | <0.0001  |
| Diabetes mellitus                     | 0.13                    | <0.0001  | 0.10                     | <0.0001  |
| Serum total cholesterol               | 0.08                    | <0.0001  | 0.11                     | <0.0001  |
| Serum HDL cholesterol                 | -0.17                   | <0.0001  | -0.14                    | <0.0001  |
| Serum triglycerides (log-transformed) | 0.19                    | <0.0001  | 0.18                     | <0.0001  |
| Use of lipid-modifying agents         | 0.06                    | 0.002    | 0.04                     | 0.07     |
| Body mass index                       | 0.17                    | <0.0001  | 0.20                     | <0.0001  |
| Estimated glomerular filtration rate  | -0.10                   | <0.0001  | -0.04                    | 0.07     |
| Electrocardiogram abnormality         | 0.09                    | <0.0001  | 0.04                     | 0.05     |
| Smoking habits                        | 0.03                    | 0.16     | 0.03                     | 0.19     |
| Alcohol intake                        | -0.001                  | 0.97     | -0.01                    | 0.73     |
| Regular exercise                      | 0.01                    | 0.51     | -0.01                    | 0.88     |
| HOMA-IR (log-transformed)             | 0.16                    | <0.0001  | 0.18                     | <0.0001  |
| Serum hs-CRP (log-transformed)        | 0.62                    | <0.0001  | 0.60                     | <0.0001  |

HDL, high-density lipoprotein; HOMA-IR, homeostasis model assessment of insulin resistance; hs-CRP, high-sensitivity C-reactive protein; LBP, lipopolysaccharide-binding protein

The correlation coefficient was assessed by Pearson's correlation for continuous variables or Spearman's rank correlation for categorical variables.

**Table S2. Association between serum lipopolysaccharide-binding protein levels and the development of cardiovascular disease and its subtypes after excluding the subjects with white blood cell count of  $\geq 8600/\mu\text{l}$  (n=2,432), 2002-2012.**

| LBP ( $\mu\text{g/mL}$ )                       | Persons<br>at risk | No. of<br>events | Hazard ratio (95% CI)   |
|------------------------------------------------|--------------------|------------------|-------------------------|
|                                                |                    |                  | Multivariable-adjusted* |
| <b>Cardiovascular disease</b>                  |                    |                  |                         |
| Q1 (2.20-9.68)                                 | 623                | 22               | 1.00 (Reference)        |
| Q2 (9.69-10.93)                                | 621                | 32               | 1.06 (0.61-1.83)        |
| Q3 (10.94-12.40)                               | 610                | 50               | 1.56 (0.93-2.60)        |
| Q4 (12.41-24.34)                               | 578                | 66               | 1.94 (1.18-3.20)        |
| <i>P</i> for trend                             |                    |                  | 0.01                    |
| Per 1-SD increment in serum LBP concentrations | 2432               | 170              | 1.25 (1.08-1.44)        |
| <b>Coronary heart disease</b>                  |                    |                  |                         |
| Q1 (2.20-9.68)                                 | 623                | 10               | 1.00 (Reference)        |
| Q2 (9.69-10.93)                                | 621                | 14               | 0.99 (0.43-2.25)        |
| Q3 (10.94-12.40)                               | 610                | 30               | 1.80 (0.86-3.76)        |
| Q4 (12.41-24.34)                               | 578                | 27               | 1.46 (0.69-3.08)        |
| <i>P</i> for trend                             |                    |                  | 0.20                    |
| Per 1-SD increment in serum LBP concentrations | 2432               | 81               | 1.25 (1.01-1.53)        |
| <b>Stroke</b>                                  |                    |                  |                         |
| Q1 (2.20-9.68)                                 | 623                | 13               | 1.00 (Reference)        |
| Q2 (9.69-10.93)                                | 621                | 21               | 1.17 (0.58-2.36)        |
| Q3 (10.94-12.40)                               | 610                | 22               | 1.23 (0.61-2.48)        |
| Q4 (12.41-24.34)                               | 578                | 45               | 2.47 (1.30-4.68)        |
| <i>P</i> for trend                             |                    |                  | 0.003                   |
| Per 1-SD increment in serum LBP concentrations | 2432               | 101              | 1.27 (1.06-1.53)        |

CI, confidence interval; LBP, lipopolysaccharide-binding protein

\*Adjusted for age, sex, systolic blood pressure, use of antihypertensive agents, diabetes mellitus, serum total cholesterol, serum high-density lipoprotein cholesterol, serum triglycerides, use of lipid-modifying agents, body mass index, estimated glomerular filtration rate, electrocardiogram abnormalities, smoking habits, alcohol intake, and regular exercise.

**Table S3. Association between serum lipopolysaccharide-binding protein levels and the development of cardiovascular disease and its subtypes after excluding the subjects who died due to fatal infection during the follow-up (n=2,522), 2002-2012.**

| LBP ( $\mu\text{g/mL}$ )                       | Persons<br>at risk | No. of<br>events | Hazard ratio (95% CI)   |
|------------------------------------------------|--------------------|------------------|-------------------------|
|                                                |                    |                  | Multivariable-adjusted* |
| <b>Cardiovascular disease</b>                  |                    |                  |                         |
| Q1 (2.20-9.68)                                 | 635                | 23               | 1.00 (Reference)        |
| Q2 (9.69-10.93)                                | 629                | 30               | 0.95 (0.55-1.65)        |
| Q3 (10.94-12.40)                               | 628                | 52               | 1.51 (0.91-2.50)        |
| Q4 (12.41-24.34)                               | 630                | 66               | 1.74 (1.06-2.84)        |
| <i>P</i> for trend                             |                    |                  | 0.02                    |
| Per 1-SD increment in serum LBP concentrations | 2522               | 171              | 1.21 (1.05-1.39)        |
| <b>Coronary heart disease</b>                  |                    |                  |                         |
| Q1 (2.20-9.68)                                 | 635                | 10               | 1.00 (Reference)        |
| Q2 (9.69-10.93)                                | 629                | 13               | 0.92 (0.40-2.13)        |
| Q3 (10.94-12.40)                               | 628                | 32               | 1.89 (0.91-3.91)        |
| Q4 (12.41-24.34)                               | 630                | 26               | 1.30 (0.61-2.75)        |
| <i>P</i> for trend                             |                    |                  | 0.10                    |
| Per 1-SD increment in serum LBP concentrations | 2522               | 81               | 1.16 (0.94-1.43)        |
| <b>Stroke</b>                                  |                    |                  |                         |
| Q1 (2.20-9.68)                                 | 635                | 14               | 1.00 (Reference)        |
| Q2 (9.69-10.93)                                | 629                | 21               | 1.09 (0.55-2.16)        |
| Q3 (10.94-12.40)                               | 628                | 24               | 1.20 (0.61-2.36)        |
| Q4 (12.41-24.34)                               | 630                | 44               | 2.09 (1.12-3.90)        |
| <i>P</i> for trend                             |                    |                  | 0.02                    |
| Per 1-SD increment in serum LBP concentrations | 2522               | 103              | 1.24 (1.03-1.49)        |

CI, confidence interval; LBP, lipopolysaccharide-binding protein

\*Adjusted for age, sex, systolic blood pressure, use of antihypertensive agents, diabetes mellitus, serum total cholesterol, serum high-density lipoprotein cholesterol, serum triglycerides, use of lipid-modifying agents, body mass index, estimated glomerular filtration rate, electrocardiogram abnormalities, smoking habits, alcohol intake, and regular exercise.

**Table S4. Risk of cardiovascular disease and its subtypes according to serum lipopolysaccharide-binding protein levels using the method proposed by Fine and Gray (n=2,568), 2002-2012.**

| LBP ( $\mu\text{g/mL}$ )      | Persons at risk | No. of events | Hazard ratio (95% CI)   |
|-------------------------------|-----------------|---------------|-------------------------|
|                               |                 |               | Multivariable-adjusted* |
| <b>Cardiovascular disease</b> |                 |               |                         |
| Q1 (2.20-9.68)                | 641             | 23            | 1.00 (Reference)        |
| Q2 (9.69-10.93)               | 643             | 33            | 1.02 (0.59-1.76)        |
| Q3 (10.94-12.40)              | 639             | 52            | 1.52 (0.91-2.51)        |
| Q4 (12.41-24.34)              | 645             | 72            | 1.94 (1.20-3.16)        |
| <i>P</i> for trend            |                 |               | 0.005                   |
| <b>Coronary heart disease</b> |                 |               |                         |
| Q1 (2.20-9.68)                | 641             | 10            | 1.00 (Reference)        |
| Q2 (9.69-10.93)               | 643             | 15            | 1.02 (0.45-2.28)        |
| Q3 (10.94-12.40)              | 639             | 32            | 1.88 (0.90-3.93)        |
| Q4 (12.41-24.34)              | 645             | 30            | 1.54 (0.73-3.24)        |
| <i>P</i> for trend            |                 |               | 0.15                    |
| <b>Stroke</b>                 |                 |               |                         |
| Q1 (2.20-9.68)                | 641             | 14            | 1.00 (Reference)        |
| Q2 (9.69-10.93)               | 643             | 22            | 1.12 (0.56-2.28)        |
| Q3 (10.94-12.40)              | 639             | 24            | 1.23 (0.62-2.44)        |
| Q4 (12.41-24.34)              | 645             | 48            | 2.34 (1.26-4.38)        |
| <i>P</i> for trend            |                 |               | 0.004                   |

CI, confidence interval; LBP, lipopolysaccharide-binding protein

\*Adjusted for age, sex, systolic blood pressure, use of antihypertensive agents, diabetes mellitus, serum total cholesterol, serum high-density lipoprotein cholesterol, serum triglycerides, use of lipid-modifying agents, body mass index, estimated glomerular filtration rate, electrocardiogram abnormalities, smoking habits, alcohol intake, and regular exercise.

**Table S5. Multivariable-adjusted hazard ratios per 1-SD increment in serum lipopolysaccharide-binding protein level for cardiovascular disease according to amount of alcohol consumption among subjects with available data (n=2,551), 2002-2012.**

| Subgroups          | Persons at risk | No. of events | Hazard ratio (95% CI) per 1-SD increment in serum LBP | <i>P</i> for heterogeneity |
|--------------------|-----------------|---------------|-------------------------------------------------------|----------------------------|
| Alcohol intake_No  | 1432            | 104           | 1.36 (1.14-1.61)                                      |                            |
| Alcohol intake_Yes |                 |               |                                                       | 0.16                       |
| <18g ethanol/day   | 541             | 39            | 1.04 (0.72-1.48)                                      |                            |
| ≥18g ethanol/day   | 578             | 37            | 1.13 (0.83-1.54)                                      |                            |

CI, confidence interval; LBP, lipopolysaccharide-binding protein; SD, standard deviation

The model was adjusted for age, sex, systolic blood pressure, use of antihypertensive agents, diabetes mellitus, serum total cholesterol, serum high-density lipoprotein cholesterol, serum triglycerides, use of lipid-modifying agents, body mass index, estimated glomerular filtration rate, electrocardiogram abnormalities, smoking habits, and regular exercise.

Figure S1. Risk of cardiovascular disease and its subtypes according to serum lipopolysaccharide-binding protein levels (n=2,568), 2002-2012.

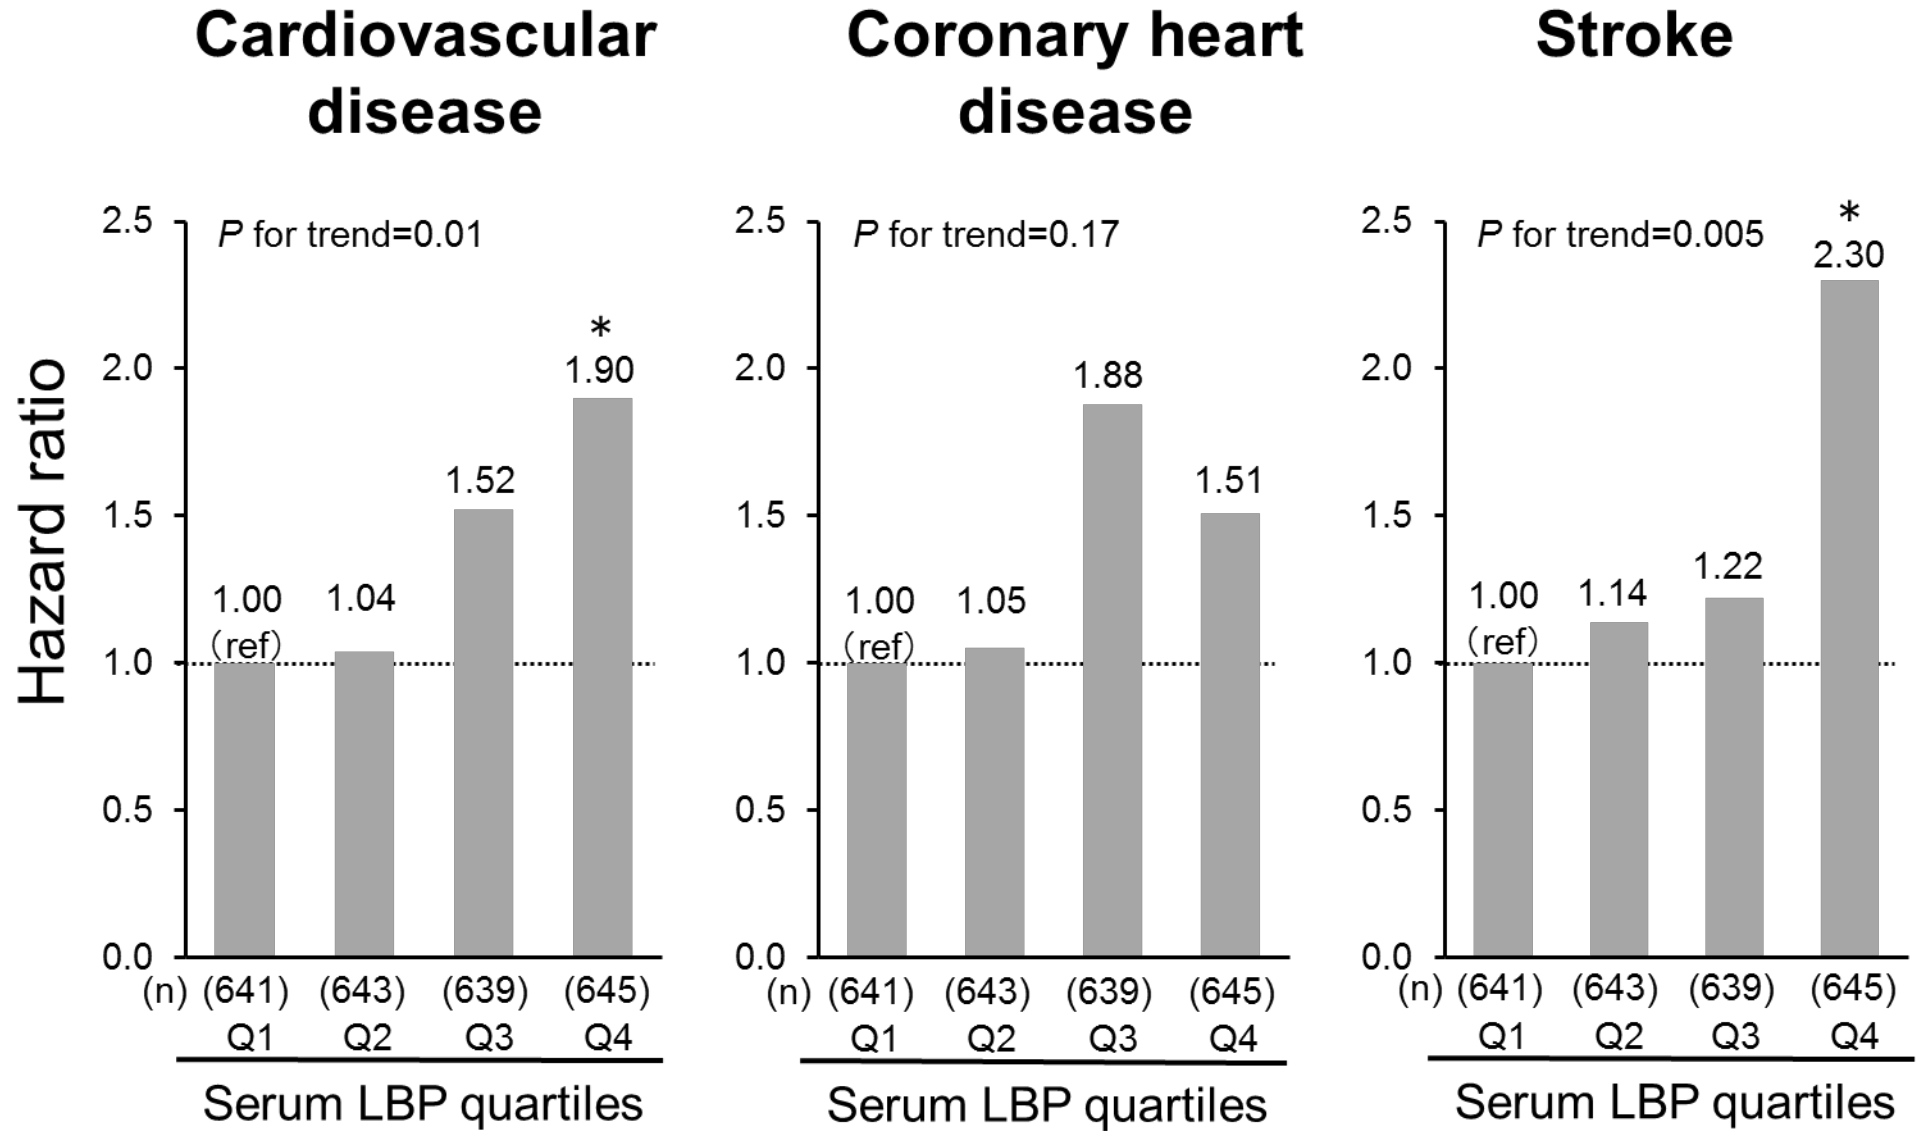

Q1 to Q4 indicate ascending quartiles of LBP levels (Q1: 2.20-9.68 µg/mL; Q2: 9.69-10.93 µg/mL; Q3: 10.94-12.40 µg/mL; Q4: 12.41-24.34 µg/mL).

\*P<0.05 vs Q1.

The hazard ratios were adjusted for age, sex, systolic blood pressure, use of antihypertensive agents, diabetes mellitus, serum total cholesterol, serum high-density lipoprotein cholesterol, serum triglycerides, use of lipid-modifying agents, body mass index, estimated glomerular filtration rate, electrocardiogram abnormalities, smoking habits, alcohol intake, and regular exercise.
